# Supplementary material for: Exploring bikeability in a metropolitan setting: stimulating and hindering factors in commuting route environments
Source: Springer Nature journal article supplement (doi:10.1186/1471-2458-12-168), 2012-03-08
Supplement: 12889_2011_3888_MOESM1_ESM.pdf [file 12889_2011_3888_MOESM1_ESM.pdf]

## How do you find the exhaust fume levels along your route?

**Inner urban:** Very low 1---2---3---4---5---6---7---8---9---10---11---12---13---14---15 Very high

↑  
neither low  
nor high

**Suburban:** Very low 1---2---3---4---5---6---7---8---9---10---11---12---13---14---15 Very high

↑  
neither low  
nor high
