# Supplementary material for: Exploring bikeability in a metropolitan setting: stimulating and hindering factors in commuting route environments
Source: Springer Nature journal article supplement (doi:10.1186/1471-2458-12-168), 2012-03-08
Supplement: 12889_2011_3888_MOESM3_ESM.pdf [file 12889_2011_3888_MOESM3_ESM.pdf]

Ugly or beautiful: How ugly/beautiful do you find the surroundings along your route?

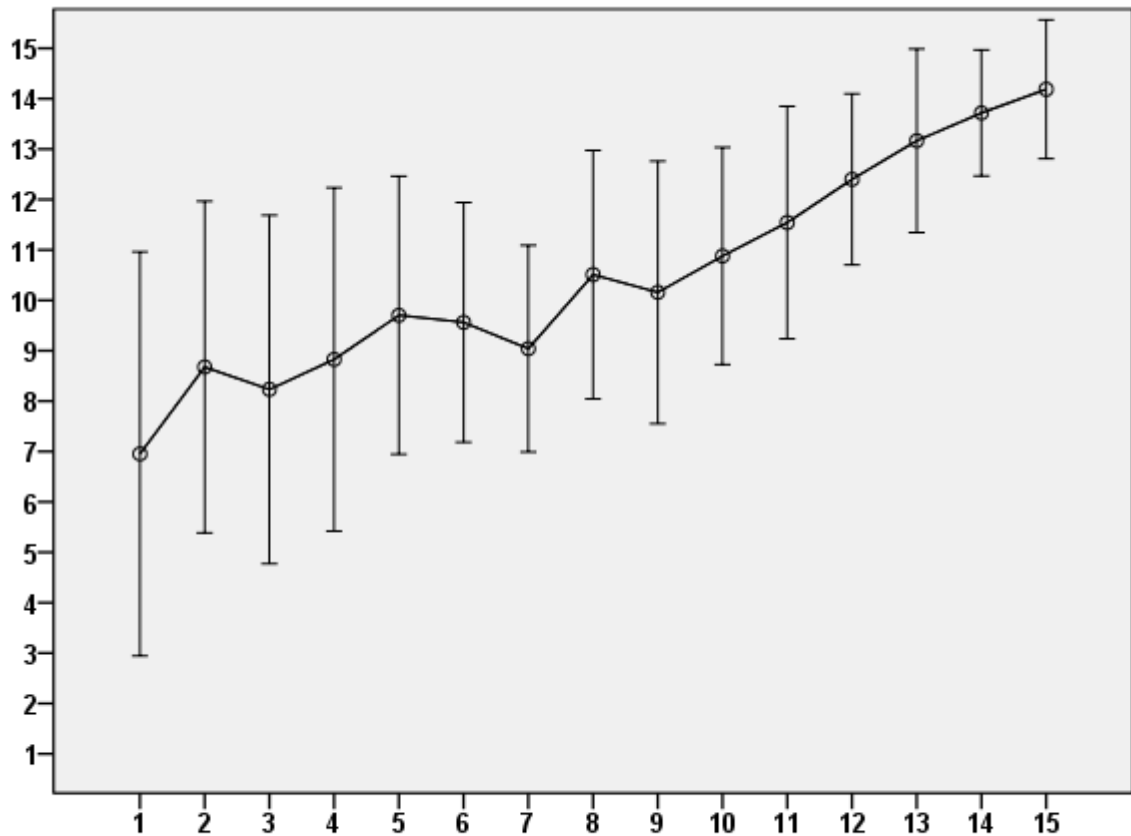

Greenery: How do you find the availability of greenery (natural areas, parks, planted items, trees) along your route?
